# Supplementary material
Source: publisher figshare collection journal article supplement (https://frontiersin.figshare.com/ndownloader/files/24455054)
Supplement: Supplementary file [file 24455054]

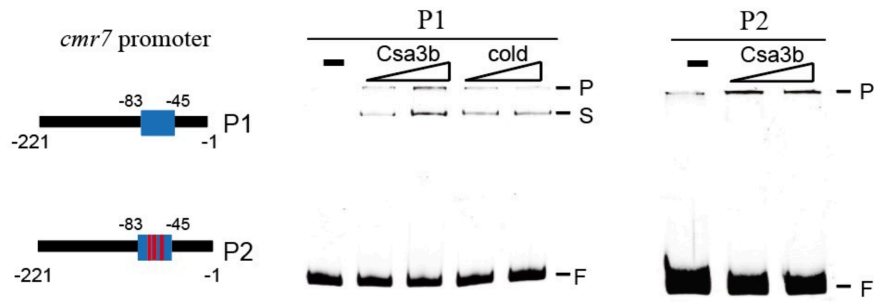

**Supplementary Figure 1. EMSA analysis of the interaction between Csa3b and *cmr7* promoter.** The full-length *cmr7* promoter was used, and a putative Csa3b binding site (-83 to -45, related to start codon) was identified by sequence similarity of Csa3b binding site identified on *csa5* promoter. P1 and P2: wild-type and mutant full-length promoter of *cmr7* gene. 5'-FAM labeled probes: 5 ng/ $\mu$ L; Csa3a: 100 and 200 ng/ $\mu$ L; cold competitor DNA: 5 and 10 ng/ $\mu$ L. P: precipitation; S: shift; F: free labeled probe.
